# Supplementary material for: Association between tumor-stroma ratio and prognosis in solid tumor patients: a systematic review and meta-analysis
Source: PubMed Central journal article supplement (PMC5356603; doi:10.18632/oncotarget.12135), 2016-09-20
Supplement: oncotarget-07-68954-s001.pdf [file oncotarget-07-68954-s001.pdf]

## Association between tumor-stroma ratio and prognosis in solid tumor patients: a systematic review and meta-analysis

### SUPPLEMENTARY TABLE

**Supplementary Table 1: Quality assessments of all the eligible studies according to the Newcastle- Ottawa scale (NOS)**

| Author           | Year | A | B | C | D | E | F | G | H | Total |
|------------------|------|---|---|---|---|---|---|---|---|-------|
| Chen Y           | 2016 | * | * | * | * | * | * | * |   | 7     |
| Pongsuvareeyakul | 2015 |   | * | * | * |   | * | * | * | 6     |
| Lv Z             | 2015 |   |   | * | * | * | * | * | * | 6     |
| Zhang TH         | 2015 | * | * | * | * | * | * |   | * | 7     |
| Zhang X          | 2015 |   |   | * | * | * | * | * | * | 6     |
| Liu J            | 2014 | * | * | * | * | * | * | * | * | 8     |
| Zhang XL         | 2014 |   | * | * | * |   | * | * | * | 6     |
| Dekker TJA       | 2013 | * | * | * | * | * | * |   | * | 7     |
| Huijbers A       | 2013 | * | * | * | * | * | * |   | * | 7     |
| Wang ZF          | 2013 |   |   | * | * | * | * | * | * | 6     |
| Wang K           | 2012 |   | * | * | * |   | * | * | * | 6     |
| de Kruijf EM     | 2011 | * | * | * | * | * | * | * |   | 7     |
| Ewout FW         | 2010 | * | * | * | * | * | * | * | * | 8     |
| Mesker WE        | 2007 | * | * | * | * |   | * |   | * | 6     |

A: representativeness of the exposed cohort; B: selection of the nonexposed cohort; C: ascertainment of exposure; D: demonstration that outcome of interest was not present at start of study; E: comparability of cohorts on the basis of the design or analysis; F: assessment of outcome; G: follow-up long enough for outcomes to occur; H: adequacy of follow-up of cohorts.
